# Supplementary material
Source: PubMed Central journal article supplement (PMC5126298)
Supplement: MCB.00330-16_zmb999101374so1.pdf [file MCB.00330-16_zmb999101374so1.pdf]

# **The inositol pyrophosphate kinase *Asp1* modulates chromosome segregation fidelity and spindle function in *S. pombe***

Boris Topolski\*, Visnja Jakopec\*, Natascha A. Künzel\* and Ursula Fleig#

## **Supplementary Figure S1**

### **Serial dilution patch tests of *S. pombe* strains.**

(A) Serial dilution patch tests ( $10^5 - 10^1$  cells) of the indicated strains on YE5S plates with (+TBZ) or without (-TBZ) 10  $\mu\text{g/ml}$  TBZ. The plates were incubated for 4 days at 25 °C. (B) Serial dilution patch tests ( $10^5 - 10^1$  cells) of the indicated strains on MM plates with (+TBZ) or without (-TBZ) 12  $\mu\text{g/ml}$  TBZ. The plates were incubated for 5 or 6 days at 25 °C.

## **Supplementary Figure S2**

### **Serial dilution patch tests of *S. pombe* strains.**

(A)-(C) Serial dilution patch tests ( $10^4 - 10^1$  cells) of the indicated strains grown on YE5S plates incubated at 25 °C for 4 days. In (C) 4  $\mu\text{g/ml}$  TBZ (+TBZ) were used.

## **Supplementary Figure S3**

### **Ark1-GFP signals in *asp1* variant cells**

(A) Fluorescence images of *asp1*<sup>+</sup> and *asp1*<sup>D333A</sup> mitotic cells expressing Ark1-GFP Sid4-mCherry. (B) Representative examples of Ark1-GFP kinetochore signals in cells with separated Sid4-mCherry signals (not shown). (C) Quantification of the relative signal intensity of kinetochore-localized Ark1-GFP. For N/strain= 20 cells. \*\*\*:  $p < 0.0005$ , two-sample t-Test. Quantification of signal: fluorescence of the entire region shown minus the background fluorescence.

## Supplementary Figure S4

### Entry into anaphase B occurs earlier in *asp1*<sup>H397A</sup> cells than *asp1*<sup>+</sup> cells

Diagrammatic representation of the time needed for spindle phases I and II as determined for *asp1*<sup>+</sup> (average time  $19.2 \pm 2.2$  min; N=23) and *asp1*<sup>H397A</sup> (average time  $17.2 \pm 1.6$  min; N=19) cells expressing Sad1-mCherry cen1-GFP. \*\*\*:  $p < 0.005$  (t-test).

## Supplementary Movie S1

Live cell imaging of a mitotic *S. pombe* wild-type cell expressing *SV40::gfp-atb2*<sup>+</sup>. 40 sec. interval between each picture. 5 frames/sec.. Bar, 2  $\mu$ m.

## Supplementary Movie S2

Live cell imaging of a mitotic *S. pombe asp1*<sup>D333A</sup> cell expressing *SV40::gfp-atb2*<sup>+</sup> showing the thin spindle midzone phenotype. 40 sec. interval between each picture. 5 frames/sec.. Bar, 2  $\mu$ m.

## Supplementary Movie S3

Live cell imaging of a mitotic *S. pombe asp1*<sup>D333A</sup> cell expressing *nmt81::gfp-atb2*<sup>+</sup> showing the broken spindle phenotype. 10 sec. interval between each picture. 5 frames/sec.. Bar, 2  $\mu$ m.

## Supplementary Movie S4

Live cell imaging of a mitotic *S. pombe asp1*<sup>D333A</sup> cell expressing *sad1-mCherry cen1-GFP* showing the broken spindle phenotype. 35 sec. interval between each picture. 5 frames/sec.. Bar, 2  $\mu$ m.
