# Supplementary material
Source: PubMed Central journal article supplement (PMC5126298)

A

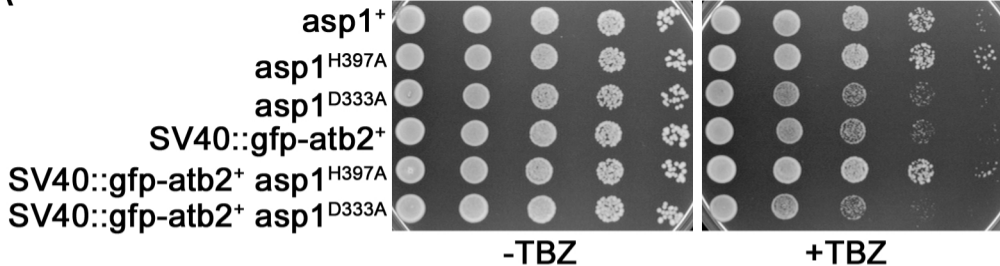

B

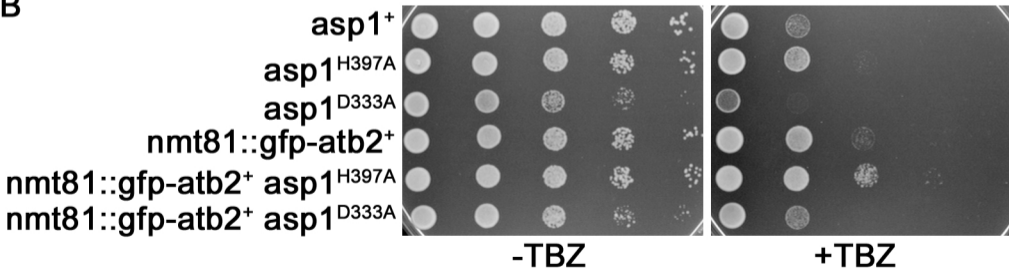

Supplement: MCB.00330-16_zmb999101374so2.pdf [file MCB.00330-16_zmb999101374so2.pdf]

A

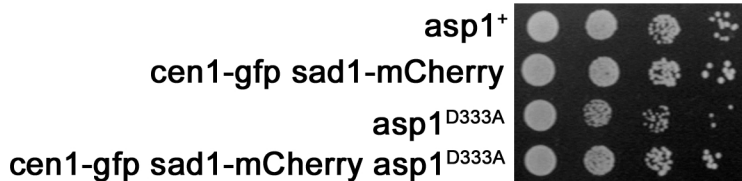

B

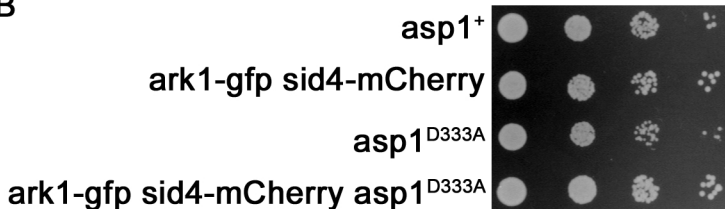

C

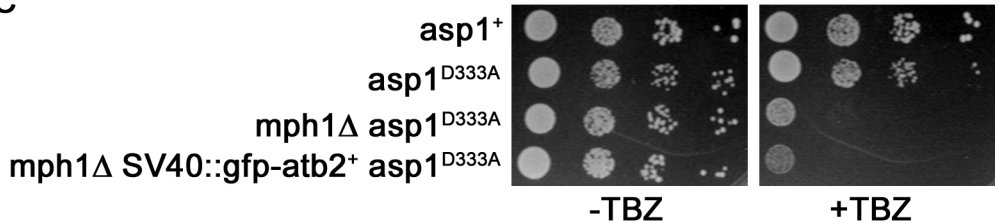

Supplement: MCB.00330-16_zmb999101374so3.pdf [file MCB.00330-16_zmb999101374so3.pdf]

A

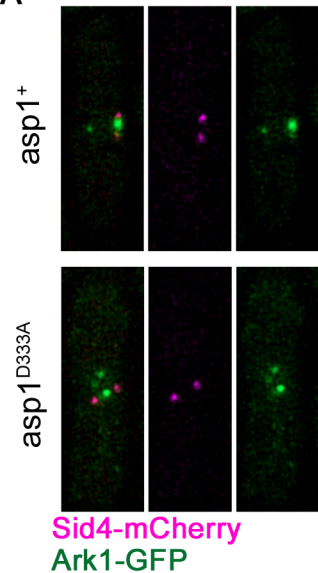

B

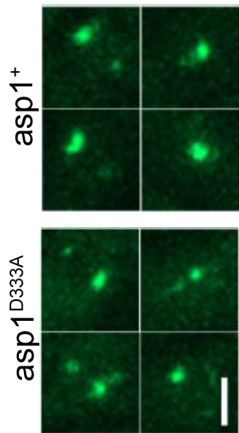

C

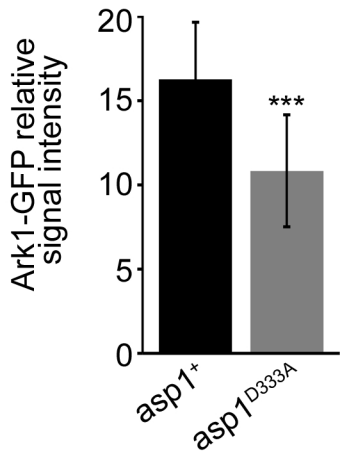

supplementary figure S3

Supplement: MCB.00330-16_zmb999101374so4.pdf [file MCB.00330-16_zmb999101374so4.pdf]

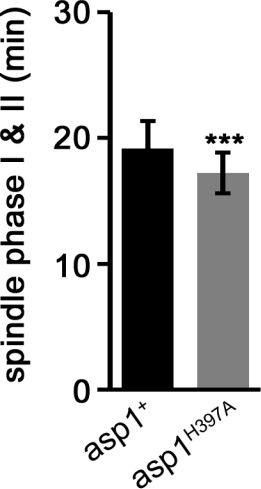

supplementary figure S4

Supplement: MCB.00330-16_zmb999101374so5.pdf [file MCB.00330-16_zmb999101374so5.pdf]
